# Supplementary material for: Modulation of crystal growth and structure within cerium-based metal–organic frameworks
Source: Royal Society of Chemistry journal article supplement (doi:10.1039/d0ce01223h), 2020-01-01
Supplement: d0ce01223h1.pdf [file d0ce01223h1.pdf]

## **Modulation of Crystal Growth and Structure within Cerium-Based Metal–Organic Frameworks**

Megan C. Wasson, Ken-ichi Otake, Xinyi Gong, Annabella R. Strathman, Timur Islamoglu, Nathan C. Gianneschi, and Omar K. Farha\*

Affiliation: International Institute for Nanotechnology and Department of Chemistry, Northwestern University, 2145 Sheridan Road, Evanston, Illinois 60208, United States

### **Table of Contents:**

- I) Materials**
- II) Materials Characterization and Synthesis**
- III) Methods for Material Characterization**
- IV) SEM Images**
- V) XPS Data**
- VI) PXRD Patterns**
- VII) TGA Data**
- VIII) References**

## I) Materials

All chemicals and solvents were obtained from commercial suppliers and used without further purification. Ammonium cerium nitrate ( $\geq 98.5\%$ ), glycine ( $\geq 99\%$ ), sodium chloride ( $\geq 99.5\%$ ), benzoic acid ( $\geq 99.5\%$ ), terephthalic acid (98%), 2,6-naphthalenedicarboxylic acid (99%), and N,N-dimethylformamide (99%) were purchased from Sigma-Aldrich. 2-naphthoic acid (98%) was purchased from Combi-Blocks. Acetone (99.8%) was purchased from Fischer Chemical. Deionized water was used as the water source.

## II) Materials and Characterization

$[\text{Ce}_6(\mu_3\text{-O})_4(\mu_3\text{-OH})_4(\text{NH}_3\text{CH}_2\text{COO})_8(\text{NO}_3)_4(\text{H}_2\text{O})_6]\text{Cl}_8 \cdot 8\text{H}_2\text{O}$  (**Ce<sub>6</sub> precursor**) was synthesized according to literature procedure.<sup>1,2</sup>

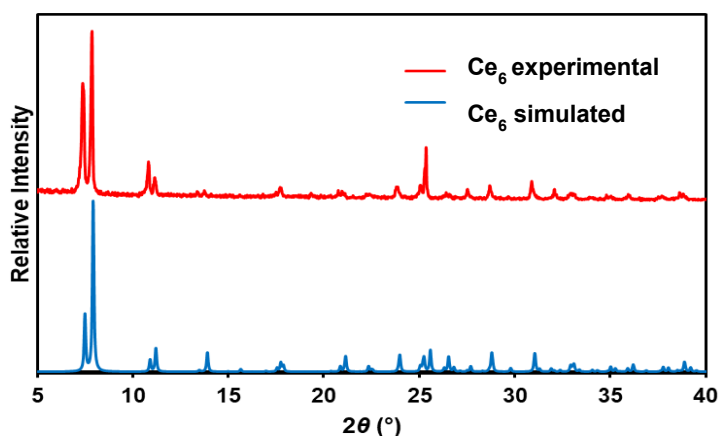

**Figure S1:** PXR D patterns ( $\lambda = 1.5406 \text{ \AA}$ ) of experimentally synthesized and simulated patterns of **Ce<sub>6</sub> precursor**.

### *Ce-MOF Modulation Protocols with Benzoic Acid*

63 mg of **Ce<sub>6</sub> precursor** was placed in 3.5 mL of DMF and sonicated until dispersed. 500  $\mu\text{L}$  of this solution was then placed in seven 1.5-dram vials. Next, the following amounts of benzoic acid were massed out and placed in the separate vials: 4.7 mg, 23.5 mg, 47 mg, 70.5 mg, 94 mg, 117.5 mg, 141 mg, 188 mg. Next, 70 mg of 2,6-naphthalenedicarboxylic acid was placed in 3.5 mL of DMF and sonicated. 500  $\mu\text{L}$  of this solution was then placed in each of the vials. The vials were then placed in a 100 °C oven for 18 hours. Upon reaction completion, the vials were removed from the oven and cooled to room temperature. The mixtures were placed in 1.5 mL centrifuge tubes and centrifuged for five minutes to remove the supernatant. Then, the resultant product was washed with N,N-dimethylformamide (1.5 mL $\times$ 2) and acetone (1.5 mL $\times$ 2). The material was then dried in a vacuum oven at 80 °C for 1 hour.

### *Ce-MOF Modulation Protocols with Trifluoroacetic Acid*

81 mg of **Ce<sub>6</sub> precursor** was placed in 4.5 mL of DMF and sonicated until dispersed. 500  $\mu$ L of this solution was then placed in nine 1.5-dram vials. Next, the following amounts of trifluoroacetic acid were added to the separate vials: 3  $\mu$ L, 7.4  $\mu$ L, 10.3  $\mu$ L, 14.7  $\mu$ L, 19.1  $\mu$ L, 23.5  $\mu$ L, 29.5  $\mu$ L, 44.2  $\mu$ L, and 58.9  $\mu$ L. Next, 90 mg of 2,6-naphthalenedicarboxylic acid was placed in 4.5 mL of DMF and sonicated. 500  $\mu$ L of this solution was then placed in each of the vials. The vials were then placed in a 100 °C oven for 18 hours. Upon reaction completion, the vials were removed from the oven and cooled to room temperature. The mixtures were placed in 1.5 mL centrifuge tubes and centrifuged for five minutes to remove the supernatant. Then, the resultant product was washed with N,N-dimethylformamide (1.5 mL $\times$ 2) and acetone (1.5 mL $\times$ 2). The material was then dried in a vacuum oven at 80 °C for 1 hour.

#### *NU-350 Synthesis*

9 mg of **Ce<sub>6</sub> precursor** was placed in 0.5 mL of DMF inside a 1.5 dram vial and sonicated until dispersed. Next, 3  $\mu$ L of trifluoroacetic acid was added. Lastly, 10 mg of 2,6-naphthalenedicarboxylic acid was solubilized in 0.5 mL of DMF which was then added to the Ce solution. The reaction was placed in a 100 °C oven for 18 hours. Upon reaction completion, the vial was removed from the oven and cooled to room temperature. The mixture was placed in 1.5 mL centrifuge tubes and centrifuged for five minutes to remove the supernatant. Then, the resultant product was washed with N,N-dimethylformamide (1.5 mL $\times$ 2) and acetone (1.5 mL $\times$ 2). The material was then dried in a vacuum oven at 80 °C for 1 hour.

#### *Ce-UiO-NDC Bulk Synthesis*

70 mg of **Ce<sub>6</sub> precursor** was added to 3.5 mL of DMF in an 8-dram vial and sonicated until dispersed. Next, 1.5 g of benzoic acid was added to this vial which was then sonicated. Separately, 100 mg of 2,6-naphthalenedicarboxylic acid was added to 5 mL of DMF which was then sonicated. This 5 mL linker solution was then added to the starting node solution. The vial was then transferred to a 100 °C oven for 18 hours. Upon reaction completion, the vial was removed from the oven and cooled to room temperature. The resulting product was then into a 15 mL centrifuge tube and washed with DMF (5 mL x 3) and acetone (5 mL x 3). The material soaked in acetone overnight, followed by additional washing with acetone (5 mL x 3). The material was then dried in the vacuum oven for 1 hour at 80 °C. The material was then activated by heating at 100 °C for overnight under high vacuum on a Micromeritics Smart Vacprep.

#### *Ce-UiO-66 Bulk Synthesis*

156 mg of **Ce<sub>6</sub> precursor** was added to 2 mL of water in a 100 mL VWR glass jar. Separately, 4 g of benzoic acid was sonicated in 9 mL of DMF which was then added to the VWR jar. 132 mg of terephthalic acid was added to 9 mL of DMF in a separate vial which was then sonicated. The resulting linker solution was then added to the glass jar. Then, the glass jar was transferred to a 100 °C oven for 18 hours. Upon reaction completion, the vial was removed from the oven and cooled to room temperature. The resulting product was then into a 15 mL centrifuge tube and washed with DMF (5 mL x 3) and acetone (5 mL x 3). The material soaked in acetone overnight, followed by additional washing with acetone (5 mL x 3). The material was then dried in the

vacuum oven for 1 hour at 80 °C. The material was then activated by heating at 100 °C for overnight under high vacuum on a Micromeritics Smart Vacprep.

**III) Methods for Material Characterization**  
*Single Crystal X-Ray Diffraction Analysis*

**Table S1:** Crystallographic details of NU-350

| <b>NU-350</b>                                            |                                                                                      |
|----------------------------------------------------------|--------------------------------------------------------------------------------------|
| <b>Empirical formula</b>                                 | C <sub>64.5</sub> H <sub>59</sub> Ce <sub>3</sub> N <sub>4.5</sub> O <sub>24.5</sub> |
| <b>Formula weight</b>                                    | 1709.52                                                                              |
| <b>Temperature/K</b>                                     | 200                                                                                  |
| <b>Crystal System</b>                                    | Triclinic                                                                            |
| <b>Space Group</b>                                       | <i>P</i> -1                                                                          |
| <i>a</i> /Å                                              | 13.2389 (6)                                                                          |
| <i>b</i> /Å                                              | 14.3168(7)                                                                           |
| <i>c</i> /Å                                              | 19.909(1)                                                                            |
| <i>α</i> /°                                              | 71.557(4)                                                                            |
| <i>β</i> /°                                              | 74.917(4)                                                                            |
| <i>γ</i> /°                                              | 75.843(3)                                                                            |
| <b>Volume/Å<sup>3</sup></b>                              | 3401.7(3)                                                                            |
| <b>Z</b>                                                 | 2                                                                                    |
| <i>ρ</i> <sub>calc</sub> /g/cm <sup>3</sup>              | 1.669                                                                                |
| <i>μ</i> /mm <sup>-1</sup>                               | 15.943                                                                               |
| <b><i>F</i>(000)</b>                                     | 1665                                                                                 |
| <b>Crystal size/mm<sup>3</sup></b>                       | 0.015×0.015×0.015                                                                    |
| <b>Radiation / Å</b>                                     | 1.54178                                                                              |
| <b>2θ range for data collection/°</b>                    | 2.387–59.296                                                                         |
| <b>Index ranges</b>                                      | 3.51–58.72                                                                           |
| <b>Reflections collected</b>                             | 18978                                                                                |
| <b>Independent reflections</b>                           | 9628                                                                                 |
| <b>Data/restraints/parameters</b>                        | 9628/223/932                                                                         |
| <b>Goodness-of-fit on <i>F</i><sup>2</sup></b>           | 1.017 ( <i>I</i> ≥ 2σ( <i>I</i> )), 1.012 (all data)                                 |
| <b>Final <i>R</i> indexes [<i>I</i> ≥ 2σ (<i>I</i>)]</b> | <i>R</i> <sub>1</sub> = 0.0527, <i>wR</i> <sub>2</sub> = 0.1235                      |
| <b>Final <i>R</i> indexes [all data]</b>                 | <i>R</i> <sub>1</sub> = 0.0729, <i>wR</i> <sub>2</sub> = 0.1338                      |
| <b>CCDC deposition number</b>                            | 2017725                                                                              |

### *Refinement Details of NU-350*

For single-crystal X-ray diffraction measurements, one crystal of NU-350 was mounted on MicroMesh (MiTeGen) in paratone oil and transferred to the cold gas stream (200 K) of a Bruker APEX II CCD area detector equipped with a Cu K $\alpha$  ( $\lambda = 1.54178 \text{ \AA}$ ) I  $\mu$ S micro-source with MX optics. Data integration and reduction were performed using Bruker SAINT program in APEX2. Absorption correction was performed by multi-scan method using SADABS.<sup>3</sup> Space groups were determined using XPREP program implemented in APEX2. The structure was determined by intrinsic phasing methods (SHELXT 2014/5)<sup>4</sup> and refined by full-matrix least-squares refinement on  $F^2$  (SHELXL-2018/3)<sup>5</sup> using the Yadokari-XG software package.<sup>6</sup> Refinement results are summarized in Table S1. Crystallographic data in CIF format have been deposited in the Cambridge Crystallographic Data Centre (CCDC) under deposition number CCDC-2017725. The data can be obtained free of charge via [www.ccdc.cam.ac.uk/data\\_request/cif](http://www.ccdc.cam.ac.uk/data_request/cif) (or from the Cambridge Crystallographic Data Centre, 12 Union Road, Cambridge CB2 1EZ, U.K.).

### **Responses to B level checkcif alert for NU-350 single crystal:**

Alert level B

[THETM01\\_ALERT\\_3\\_B](#) The value of  $\sin(\theta_{\text{max}})/\text{wavelength}$  is less than 0.575

Calculated  $\sin(\theta_{\text{max}})/\text{wavelength} = 0.5577$

**Response:** Diffraction spots from high angles were weak for this material despite several attempts at data collection. This may be because there is a large amount of disorder in the structure, especially for the coordinated solvent species.

[PLAT220\\_ALERT\\_2\\_B](#) NonSolvent Resd 1 C Ueq(max)/Ueq(min) Range 9.0 Ratio

**Response:** This may be because there is a large amount of disorder in the structure, especially for the coordinated solvent species.

### *Powder X-ray Diffraction Analysis*

Powder X-ray diffraction (PXRD) patterns of the samples were measured by a STOE-STADI MP powder diffractometer operating at 40 kV voltage and 40 mA current with Cu-K $\alpha$ 1 X-ray radiation ( $\lambda = 1.5406 \text{ \AA}$ ) in transmission geometry.

### *N<sub>2</sub> Sorption Isotherm Measurements*

N<sub>2</sub> adsorption and desorption isotherms on activated materials were measured on a Micromeritics Tristar (Micromeritics, Norcross, GA) instrument at 77 K. Around 30 mg of sample was used in each measurement. Prior to N<sub>2</sub> isotherm measurements, the samples were placed under high vacuum at 100 °C on a Micromeritics Smart Vacprep for 18 h. The specific surface areas were determined using the Brunauer–Emmett–Teller model from the N<sub>2</sub> sorption data in the region P/P<sub>0</sub> = 0.005–0.05. Pore size distributions were obtained using DFT calculations using a carbon slit-pore model with a N<sub>2</sub> kernel.

### *X-ray Photoelectron Spectroscopy*

X-ray photoelectron spectroscopy measurements were carried out on a Thermo Scientific ESCALAB 250 Xi equipped with an electron flood gun and a scanning ion gun. Analysis used the Thermo Scientific Advantage Data System software, and C1s peak (284.8 eV) peak was used as the reference. Oxidation states of Ce were assigned by comparison to previously published data.<sup>7</sup>

### *Scanning Electron Microscopy Imaging*

Prior to observation, the samples were coated with OsO<sub>4</sub> (~9 nm) in a Denton Desk III TSC Sputter Coater. Scanning electron microscopy (SEM) images were acquired from a Hitachi SU8030 scanning electron microscope.

### *High Resolution Transmission Electron Microscopy Imaging*

Transmission electron microscopy (TEM) images were collected at Northwestern University's EPIC/NUANCE facility using a TEM JEOL ARM300F equipped with a Gatan OneView-IS camera (CMOS electron sensor) at an acceleration voltage of 300 kV and an emission current of 15  $\mu$ A. The samples were prepared with Lacey carbon copper mesh grids and loaded onto a single tilt TEM holder. The cumulative electron dose was around 5 e<sup>-</sup>/ $\text{\AA}^2$ .

### *Thermogravimetric Analysis*

Sample weight loss data was measured on a Mettler Toledo TGA/DSC 1 Star System instrument. Samples were heated in air from 30°C to 600°C at a rate of 5°C/minute. The sample was held at 600°C for 60 minutes.

#### IV) SEM Images

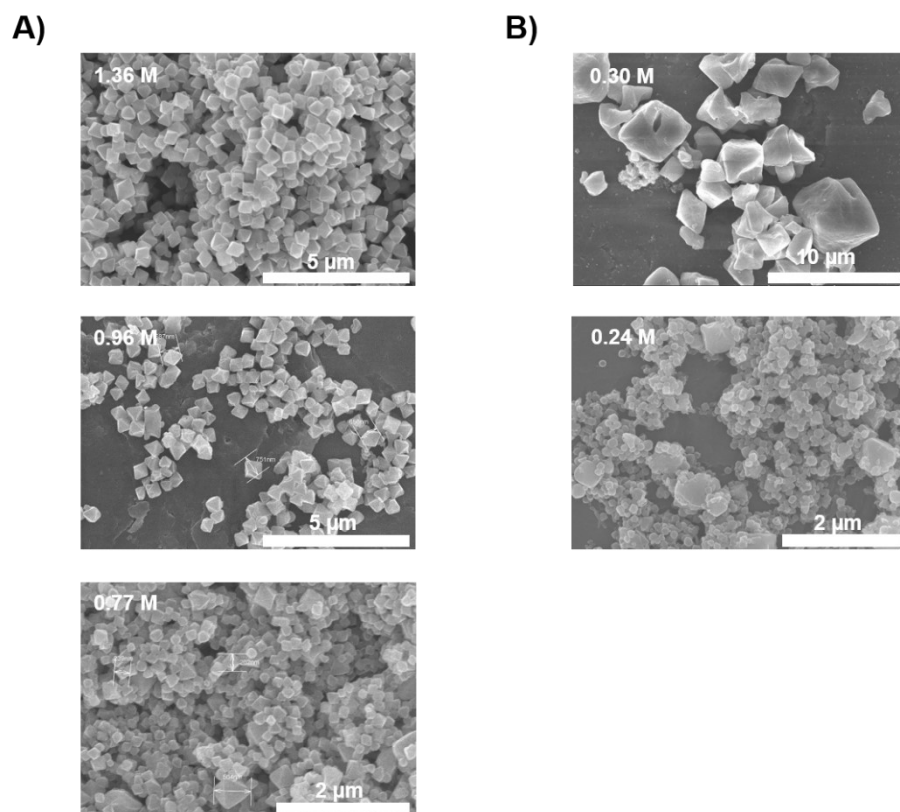

**Figure S2:** Scanning electron microscope (SEM) images of Ce-UiO-NDC under specified concentrations of either (A) benzoic acid or (B) trifluoroacetic acid.

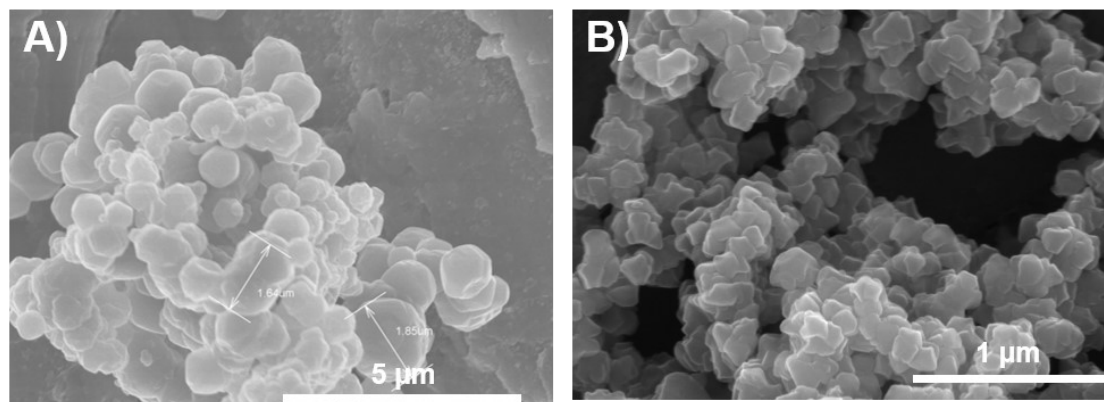

**Figure S3:** Scanning electron microscope (SEM) images of (A) Ce-UiO-NDC and (B) Ce-UiO-66 following syntheses reported from previously reported protocols.<sup>8</sup>

## V) XPS Data

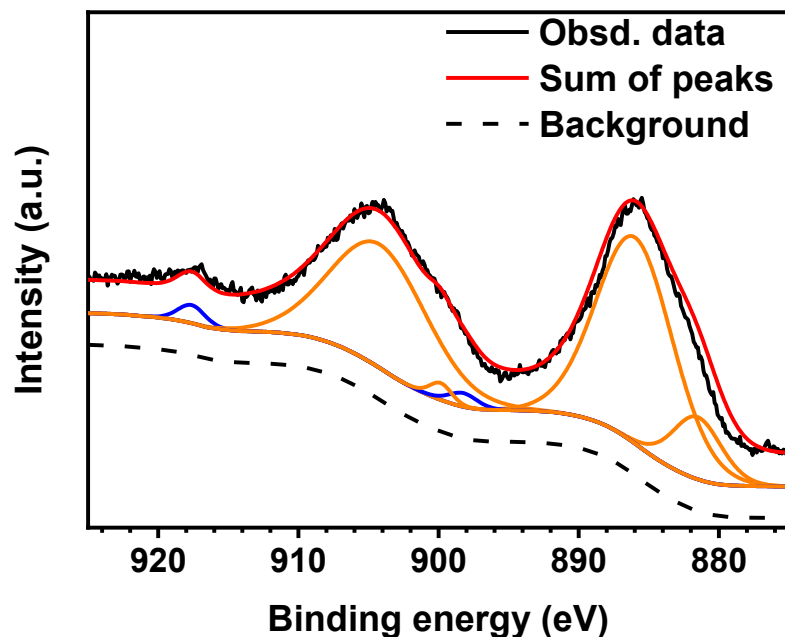

**Figure S4:** Observed Ce 3d XPS (solid black line) and sum of fitted data (red line) for NU-350. The observed data were fitted by Gaussian/Lorentzian functions with deconvoluted peaks in blue corresponding to Ce<sup>4+</sup> and orange deconvoluted peaks corresponding to Ce<sup>3+</sup>.

## VI) PXRD Patterns

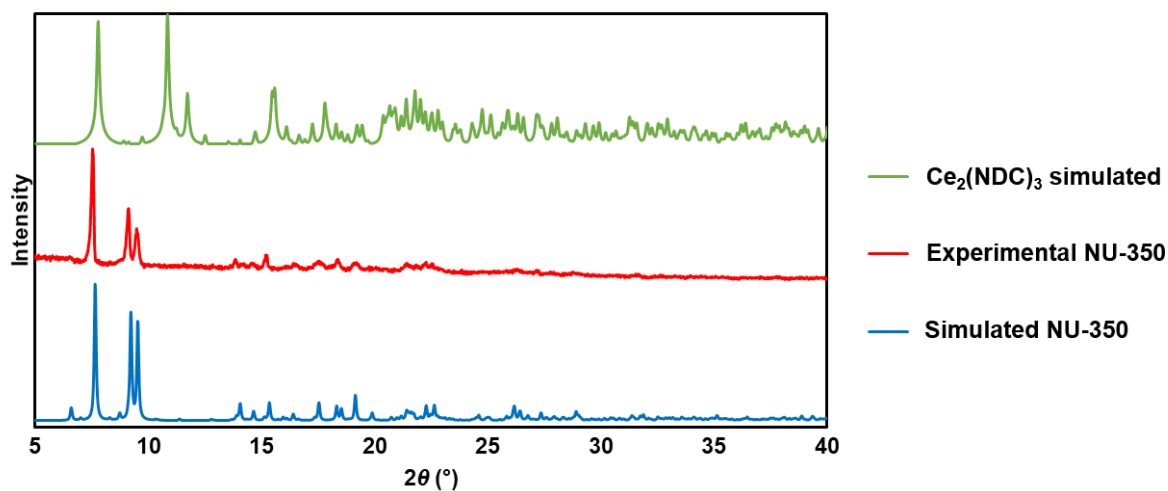

**Figure S5:** Overlaid PXRD patterns of simulated and experimentally observed NU-350 in this study as well as a simulated pattern of a similar Ce<sub>2</sub>(NDC)<sub>3</sub> framework reported in literature.<sup>9</sup>



## VII) TGA Data

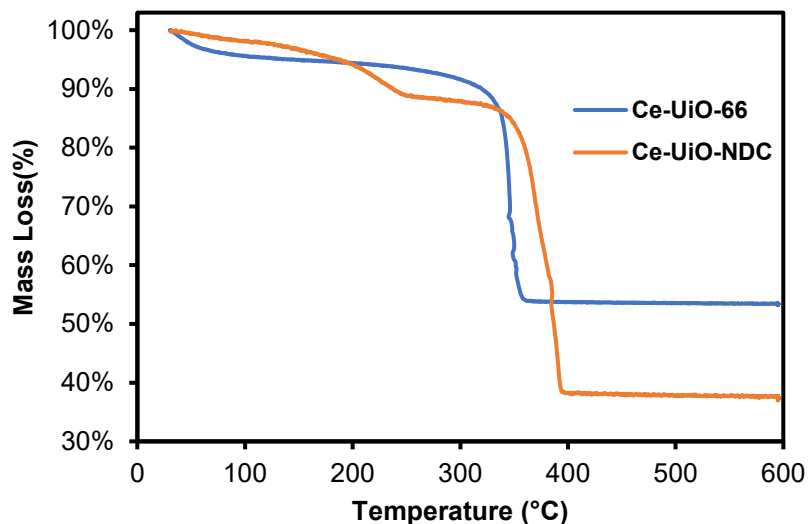

**Figure S6:** TGA data of Ce-UiO-66 and Ce-UiO-NDC large batch syntheses. The mass loss of ~39% corresponds to ~1.4 missing linkers per node in Ce-UiO-66. The mass loss of ~50% corresponds to ~0.8 missing linkers per node in Ce-UiO-NDC.

## VIII) References

- 1 S. L. Estes, M. R. Antonio and L. Soderholm, *J. Phys. Chem. C*, 2016, **120**, 5810–5818.
- 2 S. Smolders, A. Struyf, H. Reinsch, B. Bueken, T. Rhauderwiek, L. Mintrop, P. Kurz, N. Stock and D. E. De Vos, *Chem. Commun.*, 2018, **54**, 876–879.
- 3 L. Krause, R. Herbst-Irmer, G. M. Sheldrick and D. Stalke, *J. Appl. Crystallogr.*, 2015, **48**, 3–10.
- 4 G. M. Sheldrick, *Acta Crystallogr. Sect. C Struct. Chem.*, 2015, **71**, 3–8.
- 5 G. M. Sheldrick, *Univ. Göttingen, Ger.*
- 6 C. Kabuto, S. Akine, T. Nemoto and E. Kwon, *Nihon Kessho Gakkaishi*, 2009, **51**, 218–224.
- 7 E. Bêche, P. Charvin, D. Perarnau, S. Abanades and G. Flamant, in *Surface and Interface Analysis*, 2008, vol. 40, pp. 264–267.
- 8 M. Lammert, M. T. Wharmby, S. Smolders, B. Bueken, A. Lieb, K. A. Lomachenko, D. De Vos and N. Stock, *Chem. Commun.*, 2015, **51**, 12578–12581.
- 9 C. Atzori, K. A. Lomachenko, S. Øien-Ødegaard, C. Lamberti, N. Stock, C. Barolo and F. Bonino, *Cryst. Growth Des.*, 2019, **19**, 787–796.
